# Supplementary material
Source: PubMed Central journal article supplement (PMC3382509)
Supplement: 1117990109_pnas.1117990109_SI.pdf [file 1117990109_pnas.1117990109_SI.pdf]

# Supporting Information

Yu et al. 10.1073/pnas.1117990109

## SI Text

**Topography of Terminated  $\text{La}_{0.7}\text{Sr}_{0.3}\text{MnO}_3$  Thin Films.** Atomic force microscopy (AFM) measurements were used to probe the nature of the surface of  $\text{La}_{0.7}\text{Sr}_{0.3}\text{MnO}_3$  (LSMO) thin films with nominal  $\text{La}_{0.7}\text{Sr}_{0.3}\text{O}$ - and  $\text{MnO}_2$ -terminations following growth, as shown in Fig. S2. The morphology of both samples, which are grown via the layer-by-layer process, is very smooth and shows the presence of atomically flat terraces as defined by the underlying vicinal substrate and separated by steps of height approximately 0.4 nm (the lattice of one perovskite unit cell). Thus, the thin films grown in such a manner must be singly terminated. Combining this with the TOF-ISARS data, we are confident that the termination of the LSMO layer could be controlled by the growth.

**Time-of-Flight Ion Scattering and Recoiled Ion Spectroscopy (TOF-ISARS).** To confirm the termination control of the LSMO thin films, time-of-flight ion scattering and recoiled ion spectroscopy was used. This technique combines several ion spectroscopy techniques [ion scattering spectroscopy (ISS), direct recoil spectroscopy (DRS), and mass spectroscopy of recoiled ions (MSRI)], and is capable of highly sensitive surface composition analysis with isotope resolution. A schematic figure of the experimental setup is shown in Fig. S3A. During the experiments, low-energy (approximately 10 keV) pulsed potassium ions are injected onto the film surface at a grazing incident angle. As a consequence of the direct collision between the incoming ions and the surface, the elements at the topmost surface will be ionized. The created ion beam then travels through the acceleration zone with an applied electric field, with the final velocity of the ions depending on the mass-to-charge ratio. Finally, a constant electrostatic field is applied inside the reflection zone to bend the path of the ion beam toward the detector. Thus, by measuring the time needed

for the ions to reach the detector, the mass-to-charge ratio of the ions is determined.

Due to the small penetration depth of the low-energy K ions, variable surface sensitivity is realized by choosing different incident angles for the ion beam. Fig. S3B presents the data measured with  $15^\circ$  incident angle. For comparison, the data were normalized at  $^{55}\text{Mn}$  peak. Clearly, the LSMO film grown on thin SRO buffer layer exhibits enhanced intensities of La- and Sr-peaks. However, the difference between the two samples is relatively small compared with the results obtained with smaller incident angle (approximately  $5^\circ$ , Fig. 1D), which strongly supports the surface-sensitive nature of this method.

**Layer Architecture of BFO/LSMO Heterostructures with Different Terminations.** To confirm the atomic stacking sequence of the BFO/LSMO heterointerfaces, scanning transmission electron microscopy (STEM) was carried out to probe the local atomic structure of the samples. Fig. S4A and B show the layer architectures of samples with both  $\text{MnO}_2$ - ( $\text{La}_{0.7}\text{Sr}_{0.3}\text{O}$ - $\text{MnO}_2$ - $\text{BiO}$ - $\text{FeO}_2$ ) and  $\text{La}_{0.7}\text{Sr}_{0.3}\text{O}$ - ( $\text{MnO}_2$ - $\text{La}_{0.7}\text{Sr}_{0.3}\text{O}$ - $\text{FeO}_2$ - $\text{BiO}$ ) terminated interface atomic stacking sequences, respectively. For both structures, the growth direction is from left to right. The  $\text{MnO}_2$  terminated interface consists of a BFO/LSMO bilayer grown on the STO substrate (Fig. S4A). The LSMO layer is nominally 13 unit cells thick, and the BFO layer is approximately 21 nm thick. Similarly, the  $\text{La}_{0.7}\text{Sr}_{0.3}\text{O}$  terminated interface consists of a heterostructure of SRO, LSMO, and BFO grown on the STO substrate (Fig. S4B), with a nominal layer thickness of 2.5 unit cells for SRO, 13 unit cells for LSMO, and approximately 27 nm for BFO. For both heterostructures, the cross-section STEM imaging suggests atomically abrupt and highly controlled epitaxial interfaces between the LSMO and the BFO layers.

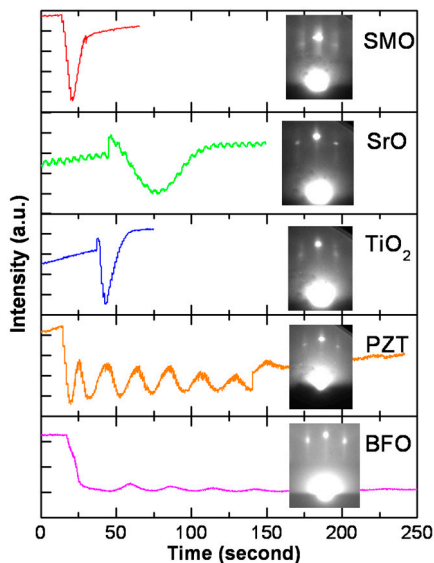

**Fig. S1.** Design of the heterointerface by epitaxial growth. RHEED pattern and the specular intensity monitored during the growth of various oxide materials. The clear intensity oscillations indicate the layer-by-layer growth mode for all the materials, which leads to the atomic-scale control of the heterointerface, therefore providing a solid platform for the current study.
